# Supplementary material for: Evaluating the origin and virulence of a Helicobacter pylori cagA-positive strain isolated from a non-human primate
Source: PubMed Central journal article supplement (PMC6206097; doi:10.1038/s41598-018-34425-4), 2018-10-29
Supplement: 41598_2018_34425_MOESM1_ESM.pdf [file 41598_2018_34425_MOESM1_ESM.pdf]

## **Supplementary Information**

**Evaluating the origin and virulence of a *Helicobacter pylori* *cagA*-positive strain isolated from a non-human primate**

**Kana Hashi, Chihiro Imai, Koji Yahara, Kamrunnesa Tahmina, Takeru Hayashi, Takeshi Azuma, Takako Miyabe-Nishiwaki, Hideyuki Sato, Masao Matsuoka, Sachi Niimi, Munehiro Okamoto and Masanori Hatakeyama**

## Supplementary methods

**RNA isolation and qPCR.** Total RNA was isolated from *H. pylori*-infected AGS cells and COS7 cells using Trizol reagent (Invitrogen). Reverse transcription was performed with 4 µg RNA using SuperScript™ II Reverse Transcriptase (Invitrogen) according to the manufacturer's protocol. The qPCR was performed using SYBR® *Premix Ex Taq*™ II (Tli RNaseH plus) (Takara) on a StepOnePlus Real-Time PCR System (Applied Biosystems). Analysis was performed using the  $\Delta\Delta C_t$  method. PCR primers were designed using Primer 3 plus (<http://www.bioinformatics.nl/cgi-bin/primer3plus/primer3plus.cgi>).

Following primers were used; AGS IL-8, 5'cctgatttctgcagctctgtgtgaag 3' and 5'attgcatctggcaaccctac3'; AGS GAPDH, 5'tgaaggtcggagtcaacggatttggt3' and 5'catgtgggccatgaggtccaccac3'. COS7 IL-8, 5'agaactgagagtgattgagagtgg3' and 5'ctcagccctcttcacaaacttc3'; COS7 GAPDH, 5'atcatctctgccccctctgctgac3' and 5'agtgagcttcccgttcagctc3'.

**Construction of the Hp\_TH2099  $\Delta cagA$  isogenic strain.** The Hp\_TH2099 *cagA* gene was amplified from the Hp\_TH2099 genome by polymerase chain reaction (PCR) using specific primers and then cloned into in the pBlueScript II SK(+) vector. A targeting vector of the Hp\_TH2099 *cagA* gene was constructed by insertion of a kanamycin-resistance gene cassette derived from the pENTR3c plasmid into the Hp\_TH2099 *cagA* gene according to a standard protocol<sup>1</sup>. The resulting targeting vector (50 µg) was added to 2 ml of the Hp\_TH2099

strain suspension ( $5 \times 10^8$  /ml) in Brucella Broth medium. After incubation for 12 h, bacteria were plated and grown on blood agar plates consisting of Trypticase Soy agar (BD) with 5% horse blood (Colorado Serum Company) containing 30  $\mu$ g/ml Kanamycin to select for the kanamycin-resistant transformant obtained after 5 days according to a standard procedure<sup>1</sup>. The grown colony was isolated and further expanded on plates. The *cagA* gene disruption and the lack of CagA expression were confirmed by sequencing, PCR analysis and an anti-CagA immunoblotting.

#### **Differentiation of ES-cell derived organoids to definitive endoderm.**

The mouse ES cell line EB3 (derived from 129/Ola strain, 9 passages) was kindly provided by Dr. Hitoshi Niwa (Center for Developmental Biology, RIKEN, Japan) and was cultured in Glasgow's MEM (GMEM) containing 10% FBS, 0.1 mM non-essential amino acids (NEAA; Sigma-Aldrich), 0.1 mM  $\beta$ -mercaptoethanol (Nacalai Tesque), and 1x penicillin/streptomycin (Wako) supplemented with 1 unit/ml mouse recombinant leukemia inhibitory factor (LIF) (Nacalai Tesque), 3  $\mu$ M CHIR99021, 2  $\mu$ M Y27632, and 1  $\mu$ M PD0325901 at 37°C in 5% CO<sub>2</sub>. There was no sign of mycoplasma contamination by a test using a Micoalart Kit (Lonza). For EB formation, mouse ES cell colonies were dissociated completely into single cells with a 0.25% trypsin–EDTA solution (Wako). Floating ES cells were collected and seeded at  $2.5 \times 10^5$  cells on a low-attachment 10 cm petri dish in EB medium [IMDM

containing 10% FBS, 200 µg/ml transferrin, 0.45 mM 1-thioglycerol, 50 µg/ml ascorbic acid, 2 mM l-glutamine and 1x penicillin/streptomycin (Wako)]. For differentiation, EBs were accumulated in a 15 ml falcon tube per dish and were re-suspended and plated in a Matrigel-coated 24-well dish using 0.25% Trypsin-EDTA. On the next day, stem cells were differentiated to the definitive endoderm.

## Supplementary Figures

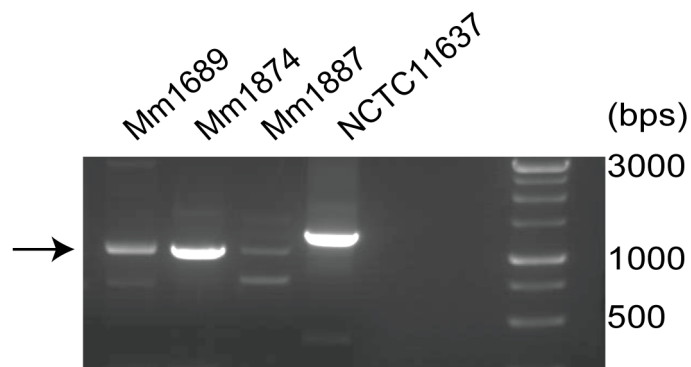

**Supplementary Figure S1. Amplification of *cagA* fragment from gastric juices of rhesus macaques.** The *cagA* fragment was amplified by PCR from DNA samples derived from gastric juice of rhesus macaques and run by using agarose gel. Mm1689, Mm1874 and Mm1887 are DNA samples obtained from each of the macaques. “NCTC11637” indicates DNA isolated from the *H. pylori* standard strain NCTC11637, which carries the ABCCC-type Western CagA, as a positive control. The arrow indicates the position of ~1000-bp fragment, which is specifically amplified by the *cagA* primers. M; 1kb-ladder marker.

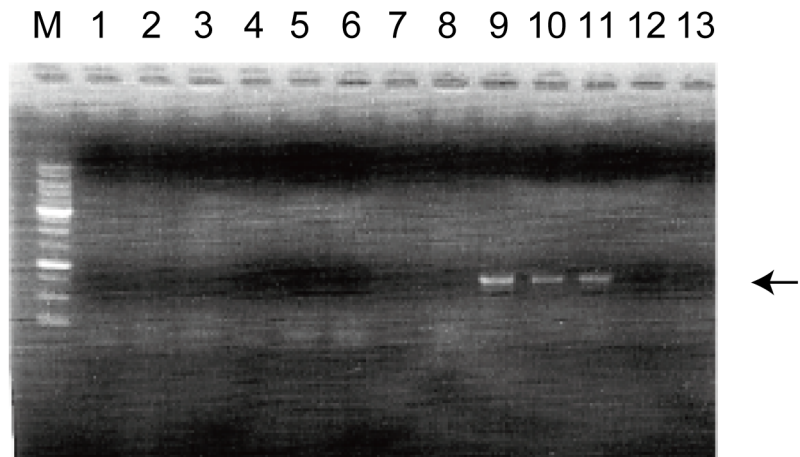

**Supplementary Figure S2. Colony directed PCR of the *H. pylori cagA* gene.** A *cagA* gene fragment was specifically amplified by PCR from bacterial colonies that were isolated from gastric juices of a Japanese macaque TH2099. The arrow indicates the position of the amplified *cagA* fragment (762-bp). M; 1kb ladder marker. Thirteen bacterial colonies (numbered from 1 to 13) were randomly picked up and subjected to the PCR analysis.

**a**

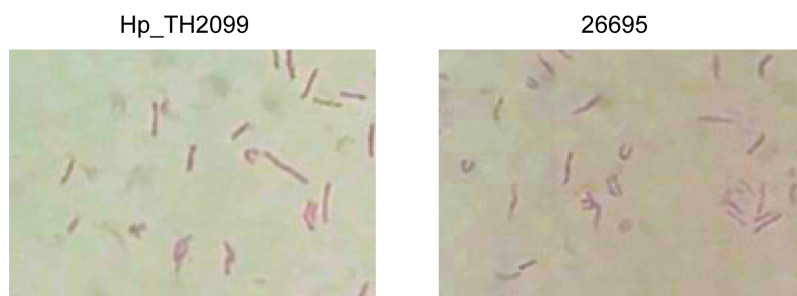

**b** (OD<sup>600</sup>)

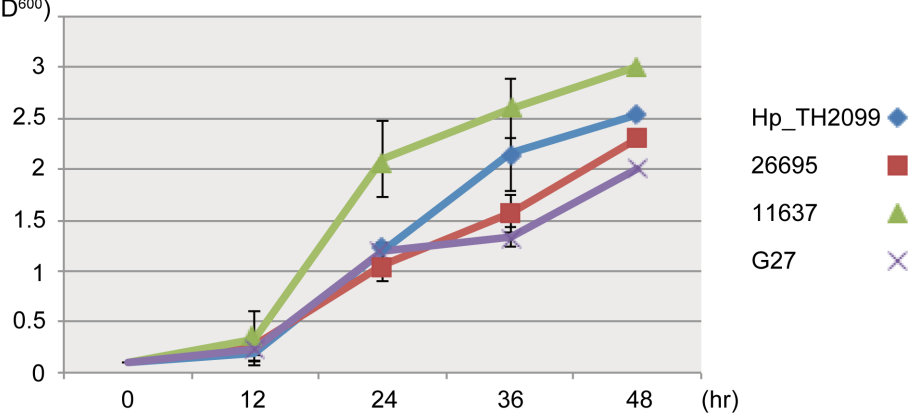

**c**

| Biological Test | Results on Hp_TH2099 |
|-----------------|----------------------|
| Urease          | Positive             |
| Oxidase         | Positive             |
| Catalase        | Positive             |

**Supplementary Figure S3. Investigation of the characteristics of Hp\_TH2099.** (a) Gram staining of Hp\_TH2099 and 26695 strains. (b) Growth curve of Hp\_TH2099, 26695, 11637 and G27 *H. pylori* strains in Brucella Broth with 10% FBS. OD: optical density. (c) Results of biological tests of Hp\_TH2099. Urease activity was measured by EB-20 (Nissui). Oxidase activity was measured by Oxidase Swabzyme (EY Laboratories) and catalase activity was measured by adding 3% H<sub>2</sub>O<sub>2</sub> to the Hp\_TH2099 culture.









d

EPIYA-C segment-coding region

```

Hp_TH2099      TTCCCTTTGAAAGGCATGATAAAGTTGATGATATCAGTAAGGTAGGGCTTTCAGCTAGCTCTGAACTCATTTACGCTACGATTGATAATCTCGGCGGACCT
Mm1874 cagA    TTCCCTTTGAAAGGCATGATAAAGTTGATGATATCAGTAAGGTAGGGCTTTCAGCTAGCTCTGAACTCATTTACGCTACGATTGATAATCTCGGCGGACCT
Mm1887 cagA    TTCCCTTTGAAAGGCATGATAAAGTTGATGATATCAGTAAGGTAGGGCTTTCAGCTAGCTCTGAACTCATTTACGCTACGATTGATAATCTCGGCGGACCT
UM067 cagA     TTCCCTTTGAAAAGGCATGATAAAGTTGATGATCTCAGTAAGGTAGGGCGATCGGTTAGCCCTGAACCATTACGCTACGATTGATGATCTCGGCGGACCT
26695 cagA     TTCCCTTTGAAAAGGCATGATAAAGTTGATGATCTCAGTAAGGTAGGGCTTTCAGCTAGCCCTGAACCATTACGCTACGATTGATGATCTCGGCGGACCT
*****
first CM sequence-coding region
  
```

```

Hp_TH2099      -----
Mm1874 cagA    -----
Mm1887 cagA    -----
UM067 cagA     TTCCCTTTGAAAGGCATGATAAAGTTGATGATCTCAGTAAGGTAGGGCGATCGGTTAGCCCTGAACCATTACGCTACGATTGATGATCTCGGCGGACCT
26695 cagA     -----
  
```

```

Hp_TH2099      TTCCCTTTGAAAGGCATGGTAAAGTTGATGATCTCAGTAAGGTAGGG
Mm1874 cagA    TTCCCTTTGAAAGGCATGGTAAAGTTGATGATCTCAGTAAGGTAGGG
Mm1887 cagA    TTCCCTTTGAAAGGCATGGTAAAGTTGATGATCTCAGTAAGGTAGGG
UM067 cagA     TTCCCTTTGAAAAGGCATGATAAAGTTGATGATCTCAGTAAGGTAGGG
26695 cagA     TTCCCTTTGAAAAGGCATGATAAAGTTGATGATCTCAGTAAGGTAGGG
*****
second CM sequence-coding region
  
```

| Identity (%)       |           |                    |                    |                   |                   |
|--------------------|-----------|--------------------|--------------------|-------------------|-------------------|
|                    | Hp_TH2099 | Mm1874 <i>cagA</i> | Mm1887 <i>cagA</i> | UM067 <i>cagA</i> | 26695 <i>cagA</i> |
| Hp_TH2099          |           | 100                | 100                | 91                | 95                |
| Mm1874 <i>cagA</i> |           |                    | 100                | 91                | 95                |
| Mm1887 <i>cagA</i> |           |                    |                    | 91                | 95                |
| UM067 <i>cagA</i>  |           |                    |                    |                   | 96                |
| 26695 <i>cagA</i>  |           |                    |                    |                   |                   |

e

EPIYA-C

```

Hp_TH2099      FPLKGHDKVDDISKVGLSASSELIYATIDNLGGF-----FPLKGHDKVDDLSKVG
Mm1874 CagA    FPLKGHDKVDDISKVGLSASSELIYATIDNLGGF-----FPLKGHDKVDDLSKVG
Mm1887 CagA    FPLKGHDKVDDISKVGLSASSELIYATIDNLGGF-----FPLKGHDKVDDLSKVG
UM067 CagA     FPLKRHDKVEDLSKVGRSVSPEPIYATIDDLGGFFPLKRHDKVDDLSKVGRSVSPEPIYATIDDLGGFFPLKRHDKVDDLSKVG
26695 CagA     FPLKRHDKVDDLSKVGLSASPEPIYATIDDLGGF-----FPLKRHDKVDDLSKVG
*****
first CM sequence                                second CM sequence
  
```

| Identity (%) |           |             |             |            |            |
|--------------|-----------|-------------|-------------|------------|------------|
|              | Hp_TH2099 | Mm1874 CagA | Mm1887 CagA | UM067 CagA | 26695 CagA |
| Hp_TH2099    |           | 100         | 100         | 82         | 86         |
| Mm1874 CagA  |           |             | 100         | 82         | 86         |
| Mm1887 CagA  |           |             |             | 82         | 86         |
| UM067 CagA   |           |             |             |            | 96         |
| 26695 CagA   |           |             |             |            |            |

**Supplementary Figure S5. Comparison of macaque-isolated *cagA/CagA* with canonical ABC-type Western *cagA/CagA*.** Pair-wise alignments were carried out by Clustal W software. **(a)** Alignment of full-length nucleotide sequences between Hp\_TH2099, Mm1874, Mm1887, and 26695 *cagA* genes. **(b)** Alignment of full-length amino acids sequences between Hp\_TH2099, Mm1874, Mm1887, and 26695 CagA proteins. **(c)** A phylogenetic tree was constructed by adding full-length sequences of Hp\_TH2099, Mm1874, Mm1887 *cagA* genes to the 199 reference *cagA* genes used in Figure 2c. Red circle indicated the positions of Hp\_TH2099, Mm1874, and Mm1887 *cagA* genes (left). Magnified view of the black dotted box in the phylogenetic tree (right). **(d)** Alignment of nucleotide sequences of Hp\_TH2099, Mm1874, Mm1887, UM067, and 26695 *cagA* gene segments encoding the EPIYA-C segment and the second (distal) CM sequence. Notably, the UM067 *cagA* gene contains tandem duplication of the nucleotide sequence encoding the EPIYA-C segment. Identical sequences are highlighted in purple. Nucleotide identities (%) are shown in the table. **(e)** Alignment of amino acid sequences of Hp\_TH2099, Mm1874, Mm1887, UM067, and 26695 CagA protein regions that correspond to the EPIYA-C segment and the second (distal) CM sequence. The UM067 CagA protein is an ABCC-type Western CagA containing two identical EPIYA-C segments in tandem. Identical amino acid sequences are highlighted in purple. Amino acid identities (%) are shown in the table.

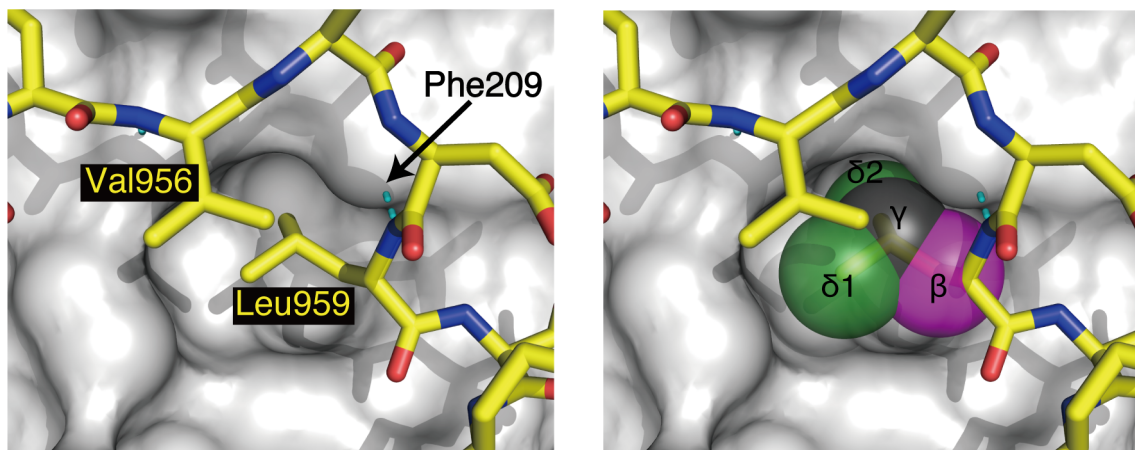

**Supplementary Figure S6. Role of the Leu residue at the 12th position from the N-terminus of the canonical CM sequence in binding of CagA with PAR1b.** Structural basis for the interaction of PAR1b (grey) with Leu959 *H. pylori* 26695 CagA, which is located at the 12th position from the N-terminus in the second CM sequence (yellow) The binding interface was created using the data of the previous work reported by Nesić and co-workers (*Nat. Struct. Mol. Biol.* **17**, 130–132, 2010, PDB ID: 3IEC) (left). Carbons in the side chain of Leu959 were represented by ball models with distinct colors;  $\beta$ -,  $\gamma$ - and  $\delta$ 1/2-carbons are shown in purple, dark grey and green, respectively (right). Main chain of Leu959 was fixed by the hydrogen bond formation (cyan dashed line) with Phe209 residue in PAR1b. The sequence corresponding to Leu959 in 26695 CagA is replaced by Ile (Ile922) in Hp\_TH2099 CagA.

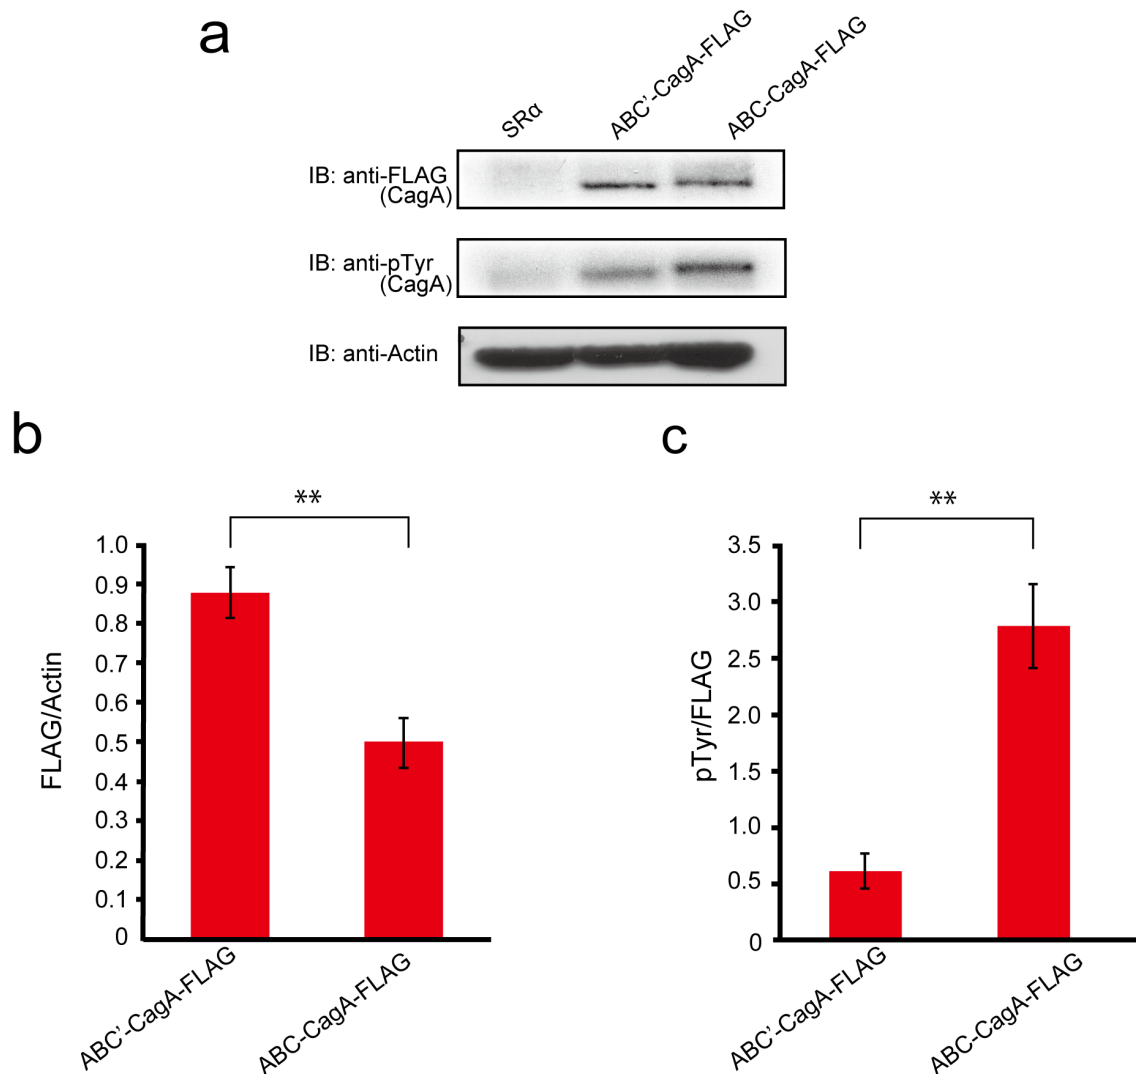

**Supplementary Figure S7. Expression and tyrosine phosphorylation of transfected CagA in AGS cells.** (a) Immunoblot analysis of transfected ABC'-CagA-FLAG and ABC-CagA-FLAG in AGS cells used for the hummingbird assay in Fig. 4d. Full-length blots are presented in Supplementary Figure S12. (b, c) Intensities of each protein bands were quantitated by ImageJ software. The FLAG/Actin ratios (b) and the phosphotyrosine (pTyr)/FLAG ratios (c) were then calculated and statistically analyzed by using Student's *t*-test. Error bars represent  $\pm$  S.D. ( $n = 3$ ), \*\*:  $p < 0.01$ .

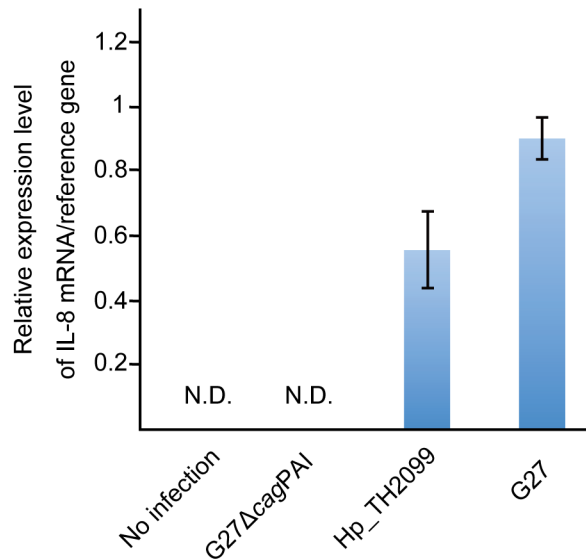

**Supplementary Figure S8. IL-8 mRNA expression analysis in Hp\_TH2099 infected COS7 cells.** Hp\_TH2099, G27ΔcagPAI and G27 strains were infected with African green monkey derived COS7 cells. RNAs were extracted from COS7 cells after 5 hours of infection and quantitative RT-PCR analysis was performed for measuring IL-8 mRNA expression levels. G27 is the *H. pylori* standard strain and G27ΔcagPAI is an isogenic strain of G27 that lacks the functional *cagPAI*. N.D.: not detected.

a

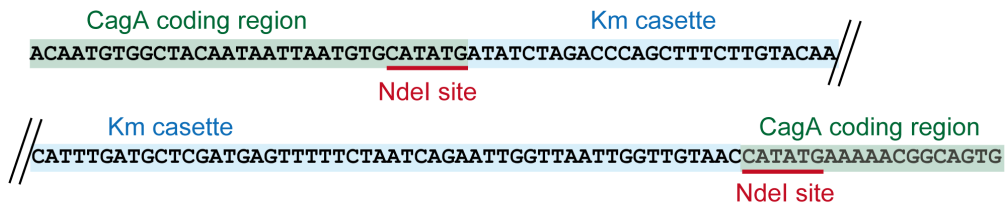

b

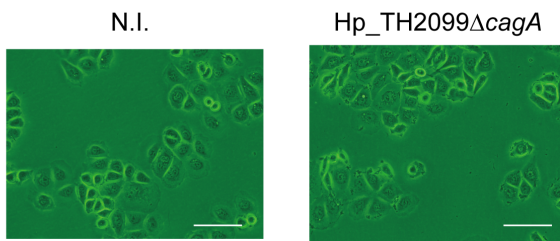

c

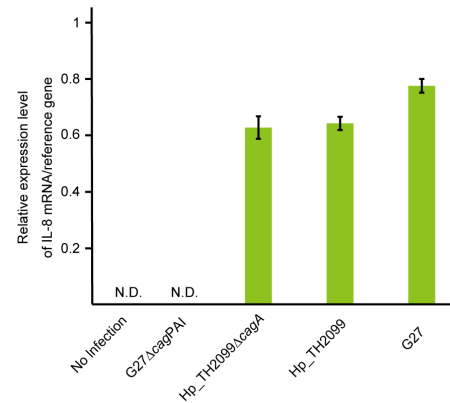

**Supplementary Figure S9. Generation and characterization of Hp\_TH2099ΔcagA.** (a) The *cagA* nucleotide sequence of Hp\_TH2099ΔcagA was read to confirm the disruption of the *cagA* coding region. (b) AGS cells were infected with the *H. pylori* Hp\_TH2099ΔcagA for 24 hours at MOI of 300. Scale bars: 100 μm. (c) IL-8 mRNA expression in AGS cells. AGS cells were infected with the Hp\_TH2099ΔcagA, parental Hp\_TH2099, G27ΔcagPAI, or parental G27 strain. RNAs were extracted from AGS cells at 5 hours after the onset of *H. pylori* infection and were subjected to quantitative RT-PCR analysis for the expression of IL-8 mRNA.



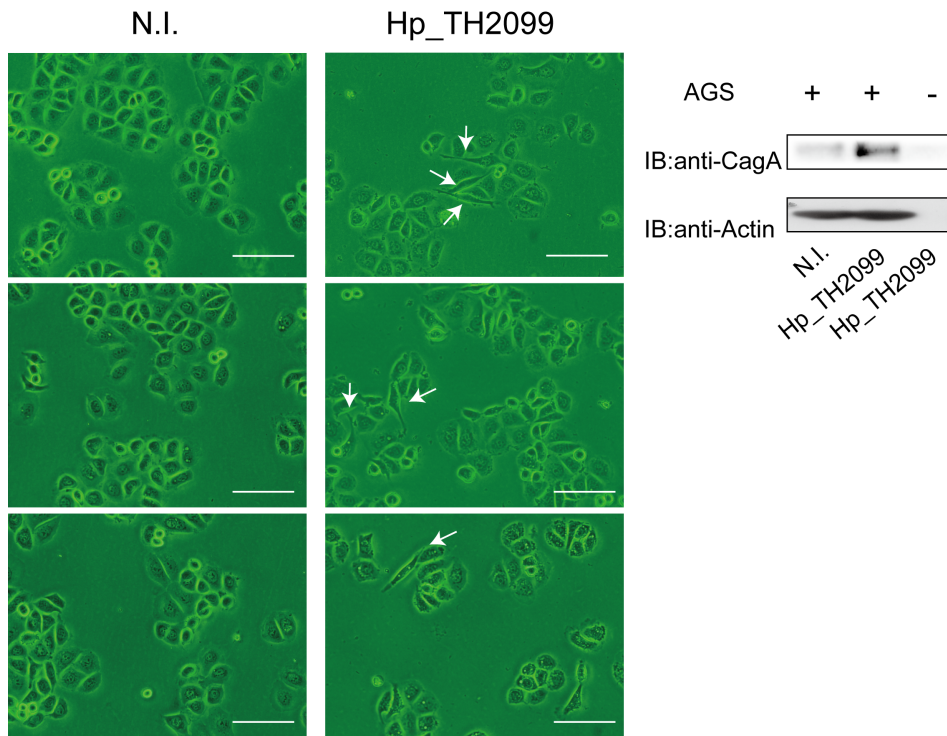

**Supplementary Figure S10. Induction of the hummingbird phenotype by infection with the *H. pylori* TH2099 strain.** AGS cells were infected with the *H. pylori* Hp\_TH2099 for 24 hours at MOI of 300. Microscopic views of AGS cells with or without Hp\_TH2099 infection. White arrows indicate cells showing the hummingbird phenotype. Scale bars: 100  $\mu$ m (left). Saponin (0.1%) extracts of non-infected (N.I.) or Hp\_TH2099-infected AGS cells were immunoblotted with an anti-CagA or an anti-Actin antibody. The Hp\_TH2099 strain cultured without AGS cells in RPMI medium were also collected and lysed by 0.1% saponin as a negative control. Full-length blots are presented in Supplementary Figure S12.

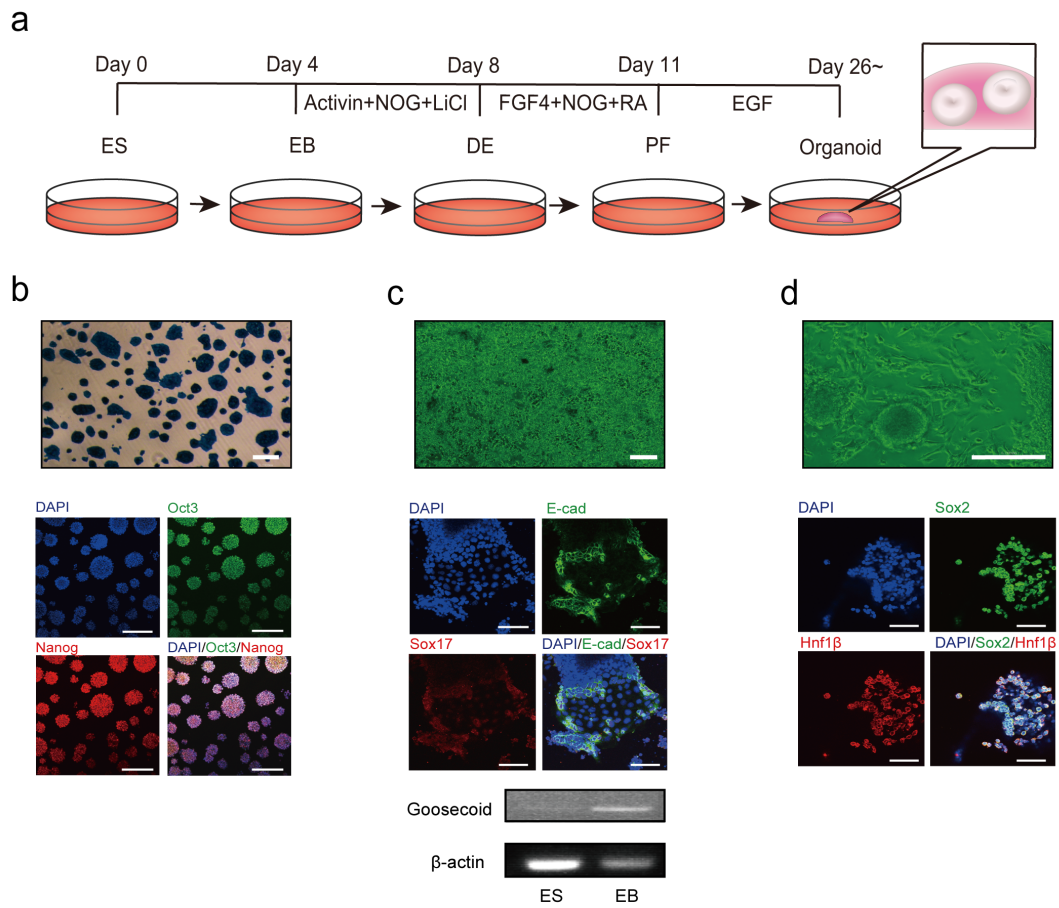

**Supplementary Figure S11. Identification of ES cells, definitive endoderm, and posterior foregut.** (a) A schematic view of the generation of organoids from mouse embryonic stem (ES) cells. Time line of the induction of organoids is shown. EB, embryonic body; DE, definitive endoderm; PF, posterior foregut, NOG: noggin, FGF4: mouse fibroblast growth factor 4, RA: retinoic acid, EGF: mouse epidermal growth factors. (b) Alkaline phosphatase assay of mouse ES cells. Scale bar; 200  $\mu\text{m}$  (upper). Immunostaining analysis for the expression of embryonic stem cell markers, Oct3 and Nanog, in mouse ES cells. Scale bar; 50  $\mu\text{m}$  (lower). (c) A microscopic image of definitive endoderm. Scale bar; 200  $\mu\text{m}$  (upper). Immunostaining analysis for the expression of definitive endoderm-specific markers, E-cadherin and Sox17. Scale bar; 50  $\mu\text{m}$  (middle). RT-PCR analysis of Goosecoid expression. ES, embryonic stem cells; DE, definitive endoderm (lower). (d) A microscopic image of the ES-derived spheroids at day 11. Scale bar; 200  $\mu\text{m}$  (upper). Immunostaining analysis for the expression of the posterior foregut markers, Sox2 and Hnf1 $\beta$ , in the spheroids at day 11. Scale bar; 50  $\mu\text{m}$  (lower).

a

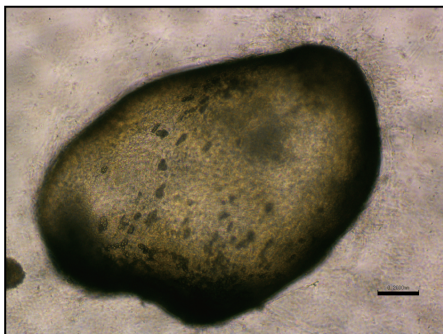

b

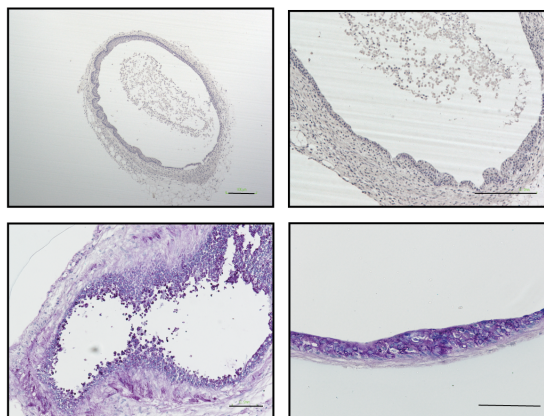

c

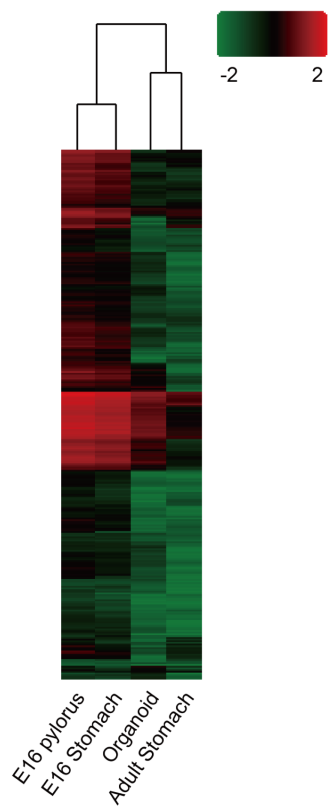

d

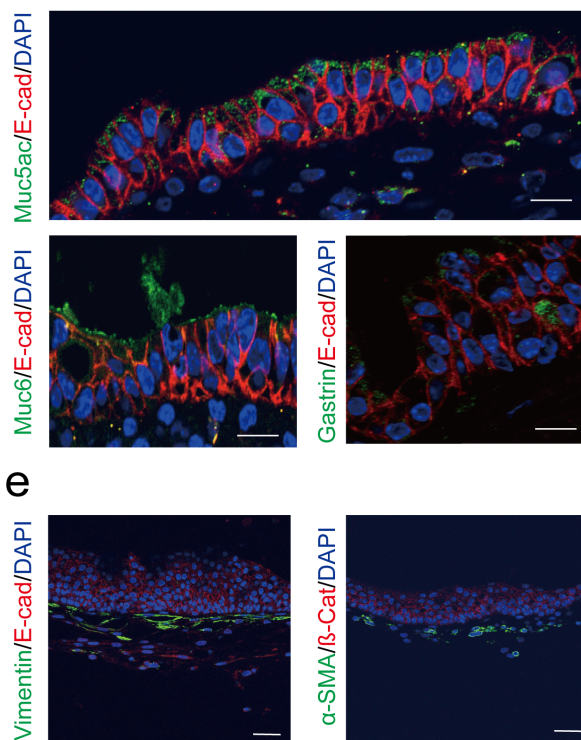

**Supplementary Figure S12. Generation of gastric organoids from mouse ES cells.** (a) A microscopic image of an ES cell-derived organoid at day 40. Scale bars: 200  $\mu\text{m}$ . (b) HE staining (upper) and Alcian blue-PAS staining (lower) of an organoid at day 40. All scale bars: 200  $\mu\text{m}$ . (c) A heat map representation of microarray data obtained using RNAs prepared from the ES-cell derived organoids at day 26, two fetal mouse stomach samples and an adult mouse stomach sample. E16 pylorus: RNA extracted from the pyloric region of the stomach of embryonic day 16 mouse. E16 stomach: RNA extracted from the stomach of embryonic day 16 mouse. Adult stomach: RNA extracted from the adult mouse stomach. (d, e) Immunostaining analysis of ES-cell derived organoids at day 40. Muc5ac, Mucin 5ac; Muc6, Mucin 6; E-cad, E-cadherin;  $\beta$ -cat,  $\beta$ -catenin;  $\alpha$ -SMA,  $\alpha$ -smooth muscle actin. Scale bars: 10  $\mu\text{m}$  for e, 50  $\mu\text{m}$  for f.

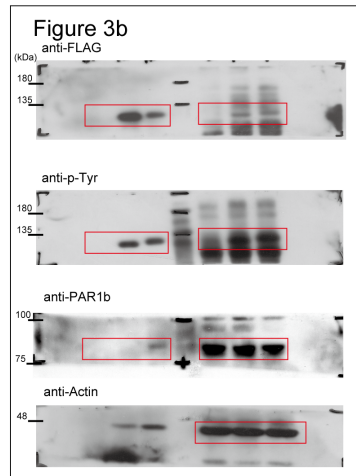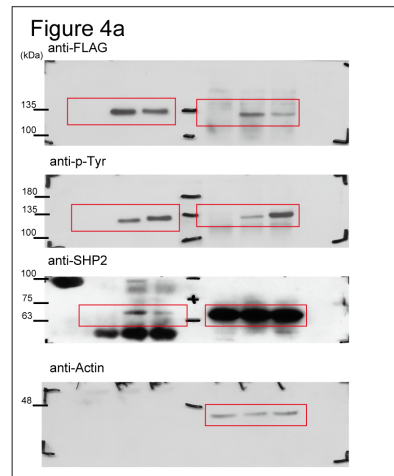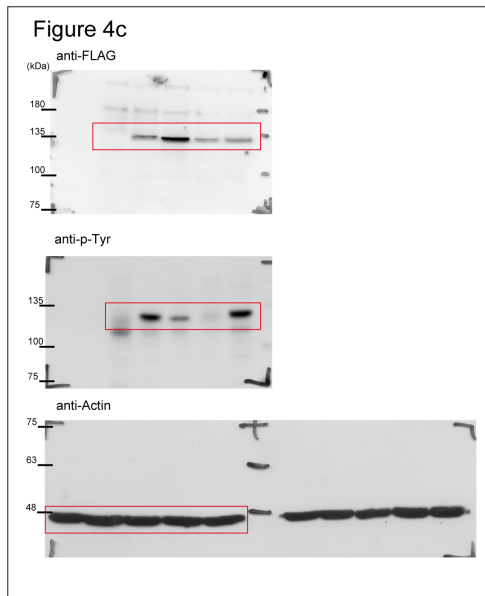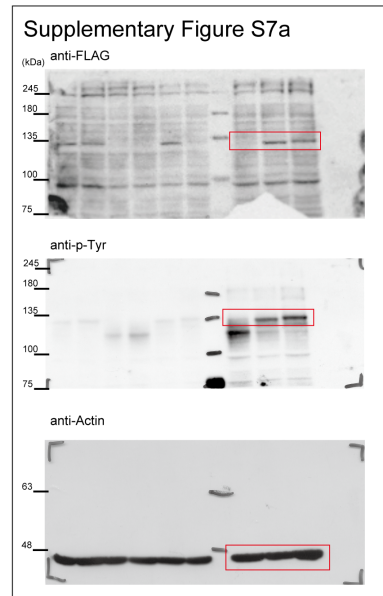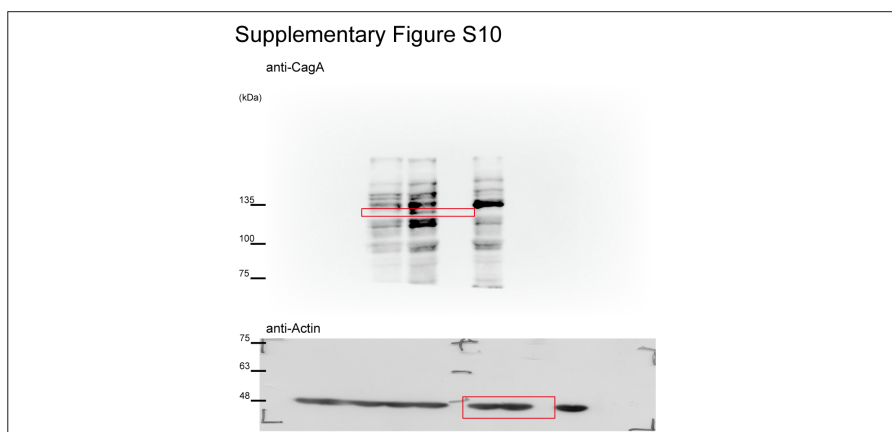

**Supplementary Figure S13. Full length blots for Figure 3b, 4a, 4c, Supplementary Figure S7a and S10. Full scans of western blotting panels. Red squares indicate where the images were cropped.**

**Supplementary Table S1. Detailed information of isolates used for population assignment, ordered based on fineSTRUCTURE.**

| Isolate ID    | Geographical source | Country      | City/region          | Assigned population | Reference                |
|---------------|---------------------|--------------|----------------------|---------------------|--------------------------|
| SA162A        | South Africa        | Mpumalanga   | Ogies, Mpumalanga    | hspAfrica1SAfrica   | Didelot et al. 2013      |
| SA227A        | South Africa        | Mpumalanga   | Ogies, Mpumalanga    | hspAfrica1SAfrica   | Didelot et al. 2013      |
| SA301A        | South Africa        | Mpumalanga   | Ogies, Mpumalanga    | hspAfrica1SAfrica   | Didelot et al. 2013      |
| SA220A        | South Africa        | Mpumalanga   | Ogies, Mpumalanga    | hspAfrica1SAfrica   | Didelot et al. 2013      |
| SA161A        | South Africa        | Mpumalanga   | Ogies, Mpumalanga    | hspAfrica1SAfrica   | Didelot et al. 2013      |
| SA214A        | South Africa        | Mpumalanga   | Ogies, Mpumalanga    | hspAfrica1SAfrica   | Didelot et al. 2013      |
| SA156A        | South Africa        | Mpumalanga   | Ogies, Mpumalanga    | hspAfrica1SAfrica   | Didelot et al. 2013      |
| SA226A        | South Africa        | Mpumalanga   | Ogies, Mpumalanga    | hspAfrica1SAfrica   | Didelot et al. 2013      |
| SA168A        | South Africa        | Mpumalanga   | Ogies, Mpumalanga    | hspAfrica1SAfrica   | Didelot et al. 2013      |
| SA146A        | South Africa        | Mpumalanga   | Ogies, Mpumalanga    | hspAfrica1SAfrica   | Didelot et al. 2013      |
| SA46C         | South Africa        | Mpumalanga   | Ogies, Mpumalanga    | hspAfrica1SAfrica   | Didelot et al. 2013      |
| SA30A         | South Africa        | Mpumalanga   | Ogies, Mpumalanga    | hspAfrica1SAfrica   | Didelot et al. 2013      |
| SA158A        | South Africa        | Mpumalanga   | Ogies, Mpumalanga    | hspAfrica1SAfrica   | Didelot et al. 2013      |
| SA35A         | South Africa        | Mpumalanga   | Ogies, Mpumalanga    | hspAfrica1SAfrica   | Didelot et al. 2013      |
| SA45A         | South Africa        | Mpumalanga   | Ogies, Mpumalanga    | hspAfrica1SAfrica   | Didelot et al. 2013      |
| SA170C        | South Africa        | Mpumalanga   | Ogies, Mpumalanga    | hspAfrica1SAfrica   | Didelot et al. 2013      |
| SA157A        | South Africa        | Mpumalanga   | Ogies, Mpumalanga    | hspAfrica1SAfrica   | Didelot et al. 2013      |
| Gambia94/24   | West Africa         | Gambia       | n/a                  | hspAfrica1WAfrica   | Human Microbiome Project |
| GAM260Bi      | West Africa         | Gambia       | n/a                  | hspAfrica1WAfrica   | Human Microbiome Project |
| GAM120Ai      | West Africa         | Gambia       | n/a                  | hspAfrica1WAfrica   | Human Microbiome Project |
| GAM118Bi      | West Africa         | Gambia       | n/a                  | hspAfrica1WAfrica   | Human Microbiome Project |
| GAM245Ai      | West Africa         | Gambia       | n/a                  | hspAfrica1WAfrica   | Human Microbiome Project |
| GAM260ASi     | West Africa         | Gambia       | n/a                  | hspAfrica1WAfrica   | Human Microbiome Project |
| GAM112Ai      | West Africa         | Gambia       | n/a                  | hspAfrica1WAfrica   | Human Microbiome Project |
| GAM115Ai      | West Africa         | Gambia       | n/a                  | hspAfrica1WAfrica   | Human Microbiome Project |
| GAM119Bi      | West Africa         | Gambia       | n/a                  | hspAfrica1WAfrica   | Human Microbiome Project |
| GAMchjs136i   | West Africa         | Gambia       | n/a                  | hspAfrica1WAfrica   | Human Microbiome Project |
| GAM246Ai      | West Africa         | Gambia       | n/a                  | hspAfrica1WAfrica   | Human Microbiome Project |
| GAM263BFi     | West Africa         | Gambia       | n/a                  | hspAfrica1WAfrica   | Human Microbiome Project |
| HP116Bi       | West Africa         | Gambia       | n/a                  | hspAfrica1WAfrica   | Human Microbiome Project |
| GAM121Aii     | West Africa         | Gambia       | n/a                  | hspAfrica1WAfrica   | Human Microbiome Project |
| GAM114Ai      | West Africa         | Gambia       | n/a                  | hspAfrica1WAfrica   | Human Microbiome Project |
| GAM80Ai       | West Africa         | Gambia       | n/a                  | hspAfrica1WAfrica   | Human Microbiome Project |
| GAM103Bi      | West Africa         | Gambia       | n/a                  | hspAfrica1WAfrica   | Human Microbiome Project |
| GAM249T       | West Africa         | Gambia       | n/a                  | hspAfrica1WAfrica   | Human Microbiome Project |
| GAM117Ai      | West Africa         | Gambia       | n/a                  | hspAfrica1WAfrica   | Human Microbiome Project |
| GAM105Ai      | West Africa         | Gambia       | n/a                  | hspAfrica1WAfrica   | Human Microbiome Project |
| GAM265BSii    | West Africa         | Gambia       | n/a                  | hspAfrica1WAfrica   | Human Microbiome Project |
| GAM254Ai      | West Africa         | Gambia       | n/a                  | hspAfrica1WAfrica   | Human Microbiome Project |
| GAM100Ai      | West Africa         | Gambia       | n/a                  | hspAfrica1WAfrica   | Human Microbiome Project |
| GAM270ASi     | West Africa         | Gambia       | n/a                  | hspAfrica1WAfrica   | Human Microbiome Project |
| GAM101Biv     | West Africa         | Gambia       | n/a                  | hspAfrica1WAfrica   | Human Microbiome Project |
| GAMchjs114i   | West Africa         | Gambia       | n/a                  | hspAfrica1WAfrica   | Human Microbiome Project |
| GAM239Bi      | West Africa         | Gambia       | n/a                  | hspAfrica1WAfrica   | Human Microbiome Project |
| GAM71Ai       | West Africa         | Gambia       | n/a                  | hspAfrica1WAfrica   | Human Microbiome Project |
| GAMchjs106B   | West Africa         | Gambia       | n/a                  | hspAfrica1WAfrica   | Human Microbiome Project |
| GAMchjs124i   | West Africa         | Gambia       | n/a                  | hspAfrica1WAfrica   | Human Microbiome Project |
| GAM231Ai      | West Africa         | Gambia       | n/a                  | hspAfrica1WAfrica   | Human Microbiome Project |
| GAMchjs117Ai  | West Africa         | Gambia       | n/a                  | hspAfrica1WAfrica   | Human Microbiome Project |
| GAM260BSi     | West Africa         | Gambia       | n/a                  | hspAfrica1WAfrica   | Human Microbiome Project |
| GAM96Ai       | West Africa         | Gambia       | n/a                  | hspAfrica1WAfrica   | Human Microbiome Project |
| GAM201Ai      | West Africa         | Gambia       | n/a                  | hspAfrica1WAfrica   | Human Microbiome Project |
| GAM244Ai      | West Africa         | Gambia       | n/a                  | hspAfrica1WAfrica   | Human Microbiome Project |
| GAM264Ai      | West Africa         | Gambia       | n/a                  | hspAfrica1WAfrica   | Human Microbiome Project |
| GAM83Bi       | West Africa         | Gambia       | n/a                  | hspAfrica1WAfrica   | Human Microbiome Project |
| SA29A         | South Africa        | South Africa | Ogies, Mpumalanga    | hpAfrica2           | Didelot et al. 2013      |
| SA194A        | South Africa        | South Africa | Ogies, Mpumalanga    | hpAfrica2           | Didelot et al. 2013      |
| SouthAfrica7  | South Africa        | South Africa | Soweto, Bantu origin | hpAfrica2           | Duncan et al. 2013       |
| SouthAfrica20 | South Africa        | South Africa | Soweto, Bantu origin | hpAfrica2           | Duncan et al. 2013       |
| SouthAfrica50 | South Africa        | South Africa | Soweto, Bantu origin | hpAfrica2           | Duncan et al. 2013       |
| SA144A        | South Africa        | South Africa | Ogies, Mpumalanga    | hpAfrica2           | Didelot et al. 2013      |
| SA253A        | South Africa        | South Africa | Ogies, Mpumalanga    | hpAfrica2           | Didelot et al. 2013      |
| SA160A        | South Africa        | South Africa | Ogies, Mpumalanga    | hpAfrica2           | Didelot et al. 2013      |
| SA155A        | South Africa        | South Africa | Ogies, Mpumalanga    | hpAfrica2           | Didelot et al. 2013      |
| SA47A         | South Africa        | South Africa | Ogies, Mpumalanga    | hpAfrica2           | Didelot et al. 2013      |
| SA34A         | South Africa        | South Africa | Ogies, Mpumalanga    | hpAfrica2           | Didelot et al. 2013      |
| SA175A        | South Africa        | South Africa | Ogies, Mpumalanga    | hpAfrica2           | Didelot et al. 2013      |
| SA169C        | South Africa        | South Africa | Ogies, Mpumalanga    | hpAfrica2           | Didelot et al. 2013      |
| SA233A        | South Africa        | South Africa | Ogies, Mpumalanga    | hpAfrica2           | Didelot et al. 2013      |



|                |              |              |                   |            |                      |
|----------------|--------------|--------------|-------------------|------------|----------------------|
| SA172C         | South Africa | South Africa | Ogies, Mpumalanga | hpAfrica2  | Didelot et al. 2013  |
| SA166A         | South Africa | South Africa | Ogies, Mpumalanga | hpAfrica2  | Didelot et al. 2013  |
| SA40A          | South Africa | South Africa | Ogies, Mpumalanga | hpAfrica2  | Didelot et al. 2013  |
| SA36C          | South Africa | South Africa | Ogies, Mpumalanga | hpAfrica2  | Didelot et al. 2013  |
| SA303C         | South Africa | South Africa | Ogies, Mpumalanga | hpAfrica2  | Didelot et al. 2013  |
| UM054          | Asia         | Malaysia     |                   | hpAsia2    | Kumar et al. 2014    |
| NAB47          | Asia         | India        | n/a               | hpAsia2    | -                    |
| UM067          | Asia         | Malaysia     | Malaysian-Indian  | hpAsia2    | Rehvathy et al. 2013 |
| FD423          | Asia         | Malaysia     | Malaysian-Indian  | hpAsia2    | Rehvathy et al. 2013 |
| UM084          | Asia         | Malaysia     | Malay origin      | hpAsia2    | Rehvathy et al. 2013 |
| UM114          | Asia         | Malaysia     | Malaysian-Indian  | hpAsia2    | Rehvathy et al. 2013 |
| UM018          | Asia         | Malaysia     | Malaysian-Indian  | hpAsia2    | Kumar et al. 2014    |
| FD430          | Asia         | Malaysia     | Malaysian-Indian  | hpAsia2    | Rehvathy et al. 2013 |
| FD703          | Asia         | Malaysia     | Malay origin      | hpAsia2    | Rehvathy et al. 2013 |
| Yangon190      | Asia         | Myanmar      |                   | hpAsia2    | *                    |
| SA222A         | Asia         | South Africa | Ogies, Mpumalanga | hpAsia2    | Didelot et al. 2013  |
| FD535          | Asia         | Malaysia     | Malaysian-Indian  | hpAsia2    | Rehvathy et al. 2013 |
| Hp_TH2099      |              |              |                   |            |                      |
| NAK7           | Asia         | India        | n/a               | hpAsia2    | -                    |
| SNT49          | Asia         | India        | Santal tribe      | hpAsia2    | -                    |
| Yangon179      | Asia         | Myanmar      |                   | hpAsia2    | *                    |
| Yangon233      | Asia         | Myanmar      |                   | hpAsia2    | *                    |
| Myanmar52      | Asia         | Myanmar      |                   | hpAsia2    | *                    |
| Myanmar51      | Asia         | Myanmar      |                   | hpAsia2    | *                    |
| Yangon142      | Asia         | Myanmar      |                   | hpAsia2    | *                    |
| Myanmar66      | Asia         | Myanmar      |                   | hpAsia2    | *                    |
| Mandalay30     | Asia         | Myanmar      |                   | hpAsia2    | *                    |
| Mandalay03     | Asia         | Myanmar      |                   | hpAsia2    | *                    |
| Yangon202      | Asia         | Myanmar      |                   | hpAsia2    | *                    |
| India7         | Asia         | India        | n/a               | hpAsia2    | -                    |
| 3754           | Europe       | France       | Bordeaux          | hpAsia3    | *                    |
| NP05           | Asia         | Nepal        | Nepal             | hpAsia2    | *                    |
| NP04           | Asia         | Nepal        | Nepal             | hpAsia2    | *                    |
| NP05-107       | Asia         | Nepal        | Nepal             | hpAsia2    | *                    |
| NP05-105       | Asia         | Nepal        | Nepal             | hpAsia2    | *                    |
| NP05-278       | Asia         | Nepal        | Nepal             | hpAsia2    | *                    |
| NP05-272       | Asia         | Nepal        | Nepal             | hpAsia2    | *                    |
| NP05-250       | Asia         | Nepal        | Nepal             | hpAsia2    | *                    |
| NP05-121       | Asia         | Nepal        | Nepal             | hpAsia2    | *                    |
| NP05-112       | Asia         | Nepal        | Nepal             | hpAsia2    | *                    |
| SSR4           | Europe       | Ireland      | Dublin            | hspEuropeN | *                    |
| SSR13          | Europe       | Ireland      | Dublin            | hspEuropeN | *                    |
| SSR8           | Europe       | Ireland      | Dublin            | hspEuropeN | *                    |
| 26695          | Europe       | UK           | n/a               | hspEuropeN | Tomb et al. 1997     |
| SSR14          | Europe       | Ireland      | Dublin            | hspEuropeN | *                    |
| HPKX_483_AG0C1 | Europe       | Sweden       | Kalix, Norrland   | hspEuropeN | Yannikis et al. 2008 |
| SSR23          | Europe       | Ireland      | Dublin            | hspEuropeN | *                    |
| SSR40          | Europe       | Ireland      | Dublin            | hspEuropeN | *                    |
| SW7A           | Europe       | Wales        | Swansea           | hspEuropeN | *                    |
| SSR20          | Europe       | Ireland      | Dublin            | hspEuropeN | *                    |
| SW21A          | Europe       | Wales        | Swansea           | hspEuropeN | *                    |
| SSR22          | Europe       | Ireland      | Dublin            | hspEuropeN | *                    |
| HPAG1          | Europe       | Sweden       | Kalix, Norrland   | hspEuropeN | Oh et al. 2006       |
| Lithuania75    | Europe       | Lithuania    | n/a               | hspEuropeN | -                    |
| SSR3           | Europe       | Ireland      | Dublin            | hspEuropeN | *                    |
| SSR2           | Europe       | Ireland      | Dublin            | hspEuropeN | *                    |
| SSR5           | Europe       | Ireland      | Dublin            | hspEuropeN | *                    |
| SSR7           | Europe       | Ireland      | Dublin            | hspEuropeN | *                    |
| SSR9           | Europe       | Ireland      | Dublin            | hspEuropeN | *                    |
| SSR33          | Europe       | Ireland      | Dublin            | hspEuropeN | *                    |
| SSR17          | Europe       | Ireland      | Dublin            | hspEuropeN | *                    |
| SSR43          | Europe       | Ireland      | Dublin            | hspEuropeN | *                    |
| BON 254        | Europe       | France       | Bordeaux          | hspEuropeN | *                    |
| SSR12          | Europe       | Ireland      | Dublin            | hspEuropeN | *                    |
| G27            | Europe       | Italy        | n/a               | hspEuropeN | Baltrus et al. 2009  |
| 3745           | Europe       | France       | Bordeaux          | hspEuropeN | *                    |
| B38            | Europe       | France       | n/a               | hspEuropeN | Thiberge et al. 2010 |
| P12            | Europe       | Germany      | n/a               | hspEuropeN | Fischer et al. 2010  |
| N6             | Europe       | France       | n/a               | hspEuropeN | *                    |
| 3843           | Europe       | France       | Bordeaux          | hspEuropeN | *                    |
| SW23Ai         | Europe       | Wales        | Swansea           | hspEuropeN | *                    |
| PHI 092        | Europe       | France       | Bordeaux          | hspEuropeN | *                    |

|            |               |             |                |            |                            |
|------------|---------------|-------------|----------------|------------|----------------------------|
| CHA 185    | Europe        | France      | Bordeaux       | hspEuropeN | *                          |
| 3746       | Europe        | France      | Bordeaux       | hspEuropeN | *                          |
| OK113      | East Asia     | Japan       | n/a            | hpEastAsia | Yahara et al. 2013         |
| 52         | East Asia     | South Korea | n/a            | hpEastAsia | -                          |
| XZ274      | Asia          | China       | n/a            | hpEastAsia | Guo et al. 2012            |
| 51         | East Asia     | South Korea | n/a            | hpEastAsia | -                          |
| HLJHP193   | Asia          | China       |                | hpEastAsia | -                          |
| F32        | East Asia     | Japan       | n/a            | hpEastAsia | Kawai et al. 2011          |
| HLJHP253   | Asia          | China       |                | hpEastAsia | -                          |
| HLJHP256   | Asia          | China       |                | hpEastAsia | -                          |
| HLJHP271   | Asia          | China       |                | hpEastAsia | -                          |
| Yangon244  | Asia          | Myanmar     |                | hpEastAsia | *                          |
| Yangon222  | Asia          | Myanmar     |                | hpEastAsia | *                          |
| OK310      | East Asia     | Japan       | n/a            | hpEastAsia | Yahara et al. 2013         |
| CPY1962    | East Asia     | Japan       | n/a            | hpEastAsia | Blanchard et al. 2013      |
| CPY6271    | East Asia     | Japan       | n/a            | hpEastAsia | Blanchard et al. 2013      |
| 83         | East Asia     | unknown     | n/a            | hpEastAsia | David Graham               |
| CPY6261    | East Asia     | Japan       | n/a            | hpEastAsia | Blanchard et al. 2013      |
| CPY1124    | East Asia     | Japan       | n/a            | hpEastAsia | Blanchard et al. 2013      |
| CPY3281    | East Asia     | Japan       | n/a            | hpEastAsia | Blanchard et al. 2013      |
| F30        | East Asia     | Japan       | n/a            | hpEastAsia | Kawai et al. 2011          |
| Oct-98     | East Asia     | Japan       | n/a            | hpEastAsia | -                          |
| 35A        | East Asia     | Japan       | n/a            | hpEastAsia | David Graham               |
| F16        | East Asia     | Japan       | n/a            | hpEastAsia | Kawai et al. 2011          |
| CPY1313    | East Asia     | Japan       | n/a            | hpEastAsia | Blanchard et al. 2013      |
| F57        | East Asia     | Japan       | n/a            | hpEastAsia | Kawai et al. 2011          |
| CPY6081    | East Asia     | Japan       | n/a            | hpEastAsia | Blanchard et al. 2013      |
| CPY6311    | East Asia     | Japan       | n/a            | hpEastAsia | Blanchard et al. 2013      |
| Yangon159  | Asia          | Myanmar     |                | hpEastAsia | *                          |
| 8A3        | East Asia     | unknown     | Experimental   | hpEastAsia | Graham 2004, Kenneman 2011 |
| Manado-1   | Asia          | Indonesia   | Manado         | hpEastAsia | -                          |
| Taiwan-47  | East Asia     | Taiwan      | n/a            | hpEastAsia | -                          |
| UM077      | Asia          | Malaysia    | Chinese Malay  | hpEastAsia | Rehvathy et al. 2013       |
| UM085      | Asia          | Malaysia    | Chinese Malay  | hpEastAsia | Rehvathy et al. 2013       |
| UM111      | Asia          | Malaysia    | Chinese Malay  | hpEastAsia | Rehvathy et al. 2013       |
| Mandalay38 | Asia          | Myanmar     |                | hpEastAsia | *                          |
| UM007      | Asia          | Malaysia    | Chinese Malay  | hpEastAsia | Kumar et al. 2014          |
| CPY1662    | East Asia     | Japan       | n/a            | hpEastAsia | -                          |
| Yangon173  | Asia          | Myanmar     |                | hpEastAsia | *                          |
| FD506      | Asia          | Malaysia    | Chinese Malay  | hpEastAsia | Rehvathy et al. 2013       |
| UM038      | Asia          | Malaysia    | Chinese Malay  | hpEastAsia | Rehvathy et al. 2013       |
| UM032      | Asia          | Malaysia    | ?              | hpEastAsia | Khosravi et al. 2013       |
| UM023      | Asia          | Malaysia    | Chinese Malay  | hpEastAsia | Rehvathy et al. 2013       |
| UM065      | Asia          | Malaysia    | Chinese Malay  | hpEastAsia | Rehvathy et al. 2013       |
| UM066      | Asia          | Malaysia    | Chinese Malay  | hpEastAsia | -                          |
| UM034      | Asia          | Malaysia    | Chinese Malay  | hpEastAsia | Kumar et al. 2014          |
| FD577      | Asia          | Malaysia    | Chinese Malay  | hpEastAsia | Rehvathy et al. 2013       |
| FD568      | Asia          | Malaysia    | Chinese Malay  | hpEastAsia | Rehvathy et al. 2013       |
| PeCan4     | South America | Peru        | n/a            | Hybrid     | -                          |
| Sat464     | Ind. America  | Peru        | Satipo region  | hspAmerind | -                          |
| Shi470     | Ind. America  | Peru        | Shimaa village | hspAmerind | -                          |
| Shi169     | Ind. America  | Peru        | Shimaa village | hspAmerind | -                          |
| Shi417     | Ind. America  | Peru        | Shimaa village | hspAmerind | -                          |
| Cuz20      | Ind. America  | Peru        | Cuzco          | hspAmerind | -                          |
| Shi112     | Ind. America  | Peru        | Shimaa village | hspAmerind | -                          |
| Aklavik117 | North America | Canada      | Aklavik        | hspAmerind | -                          |
| v225d      | South America | Venezuela   | Piaroan indian | hspAmerind | -                          |
| Puno135    | Ind. America  | Peru        | Puno           | hspAmerind | -                          |
| Puno120    | Ind. America  | Peru        | Puno           | hspAmerind | -                          |

## References

1. Haas, R., Meyer, T.F., Van Putten, J.P.M. A flagellated mutants of *Helicobacter pylori* generated by genetic transformation of naturally competent strains using transposon shuttle mutagenesis. *Mol. Microbiol.* **8**, 753-760 (1993).
